# Supplementary material
Source: Springer Nature journal article supplement (https://www.springermedizin.de/resource/supplementary/13014_2011_461_MOESM9_ESM.pdf/9633442)

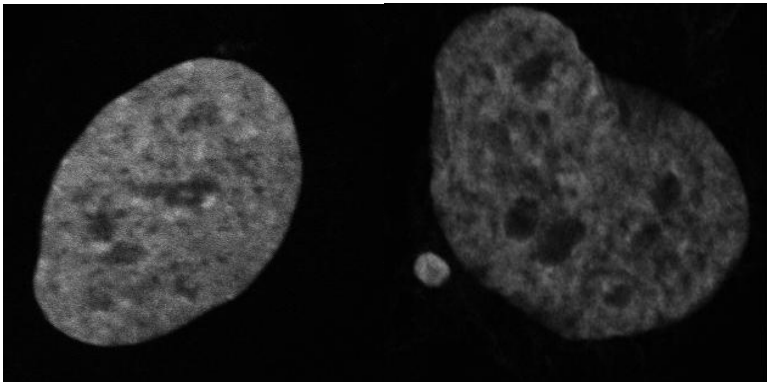

Control

30 minutes

24 hours

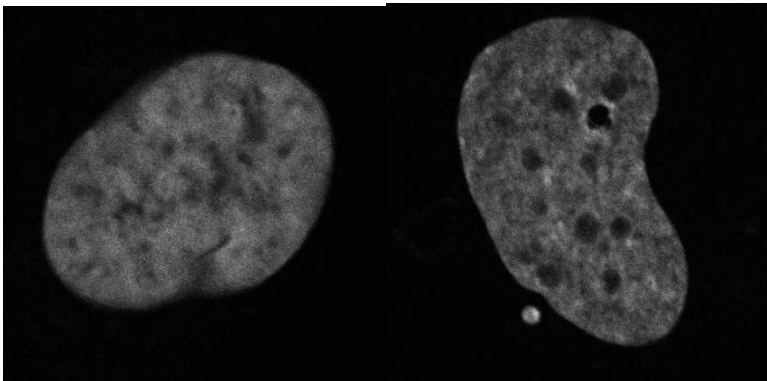

SAHA 1 $\mu$ M

30 minutes

24 hours

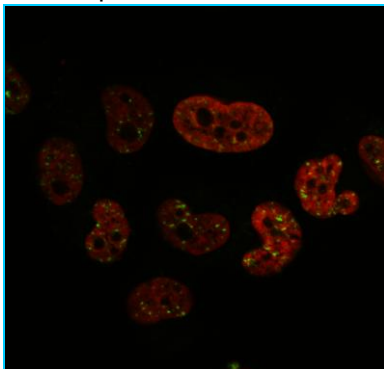

3 Gy HIT

30 minutes

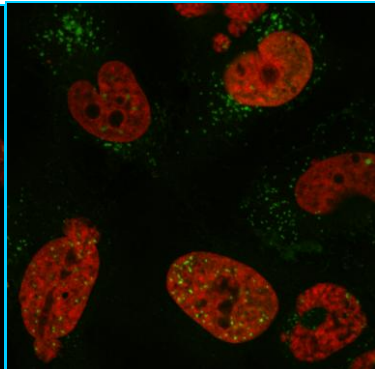

24 hours

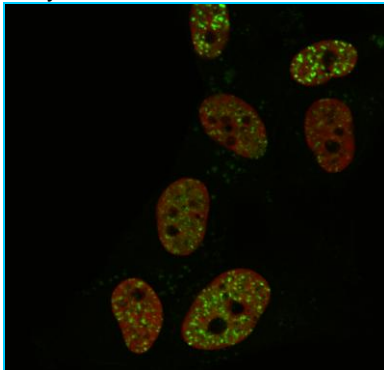

3 Gy HIT +

30 minutes

1 $\mu$ M SAHA

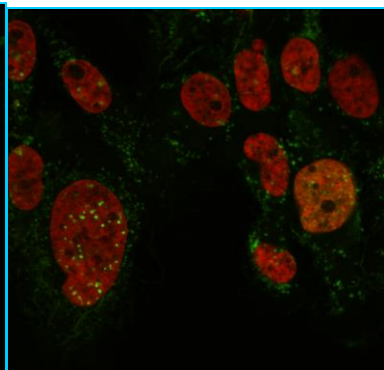

24 hours

Supplement: MOESM9 [file 9633442]
